# Supplementary material
Source: PubMed Central journal article supplement (PMC4345182)
Supplement: jcbn14-76sf01.pdf [file jcbn14-76sf01.pdf]

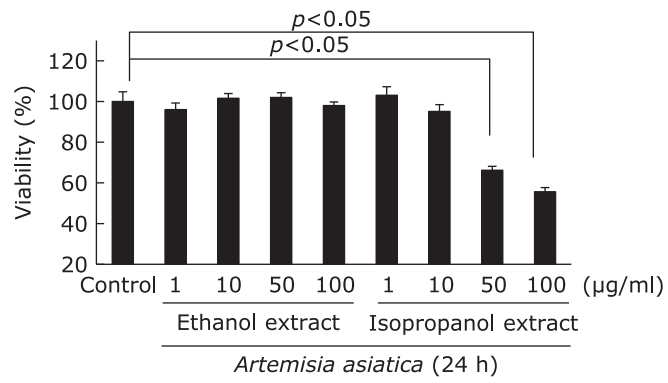

**Supplemental Fig. 1.** MTT assay for cell viability according to extracts of *Artemisia*. High concentration of *Artemisia* extracts were tested for their cytotoxic activity using the MTT colorimetric assay in RGM-1 cells.
