# Supplementary material
Source: PubMed Central journal article supplement (PMC4345182)
Supplement: jcbn14-76st01.pdf [file jcbn14-76st01.pdf]

**Supplemental Table 1. The 89 cytokines in Cytokine Antibody Array**

| 89 Cytokines contained in protein assay (RayBiotech) |               |                |                       |                  |              |
|------------------------------------------------------|---------------|----------------|-----------------------|------------------|--------------|
| ADAMTS1                                              | Amphiregulin  | Angiogenin     | Angiopoietin-1        | Angiopoietin-3   | BCA-1        |
| CCL28                                                | CCL6/C10      | Chemerin       | CINC-2 $\alpha/\beta$ | CINC-3           | CNTF         |
| Coagulation Factor III                               | CRG-2         | CTACK          | CXCL1                 | CXCL16           | C5a          |
| DLL4                                                 | DPPIV         | EGF            | Endoglin              | Endostatin       | Endothelin-1 |
| Eotaxin                                              | FGF acidic    | FGF basic      | FGF-7/KGF             | Fractalkine      | GM-CSF       |
| HB-EGF                                               | HGF           | ICAM-1         | IFN- $\gamma$         | IGFBP-1          | IGFBP-2      |
| IGFBP-3                                              | IGFBP-9       | IGFBP-10       | IL-1 $\alpha$         | IL-1 $\beta$     | IL-1ra       |
| IL-2                                                 | IL-3          | IL-4           | IL-6                  | IL-10            | IL-13        |
| IL-16                                                | IL-17         | IP-10          | I-TAC                 | Leptin           | LIX          |
| L-Selectin                                           | MCP-5         | MCP-1          | MCP-2                 | MDC              | MIG          |
| MIP-1 $\alpha$                                       | MIP-1 $\beta$ | MIP-1 $\gamma$ | MIP-2                 | MIP-3 $\alpha$   | MMP-3        |
| MMP-8                                                | MMP-9         | Osteopontin    | PAI-1                 | PD-ECGF          | PDGF-AA      |
| PDGF-AB/BB                                           | PEDF          | Pentraxin-3    | PF4                   | PIGF-2           | Prolactin    |
| Proliferin                                           | RANTES        | SDF-1          | Thrombospondin-2      | Thymus Chemokine | TIMP-1       |
| TIMP-4                                               | TNF- $\alpha$ | VEGF           | VEGF-B                | 6Ckine           |              |
